# Supplementary material
Source: MDPI journal article supplement (https://www.mdpi.com/2072-4292/13/15/2921)
Supplement: s1 [file s1]

## Supplementary materials for:

### Effect Analysis of the Digital Spectrometer FFT Algorithm on THz Atmospheric Limb Sounder (TALIS) System Sensitivity

Haowen Xu <sup>1,2</sup>, Hao Lu <sup>1</sup>, Zhenzhan Wang <sup>1</sup>, Wenming He <sup>1,2</sup>, Wenyu Wang <sup>1</sup>

<sup>1</sup> Key Laboratory of Microwave Remote Sensing, National Space Science Center, Chinese Academy of Sciences, Beijing 100190, China;

<sup>2</sup> University of Chinese Academy of Sciences, Beijing 100049, China

## Content of this file

Figures S1 to S9

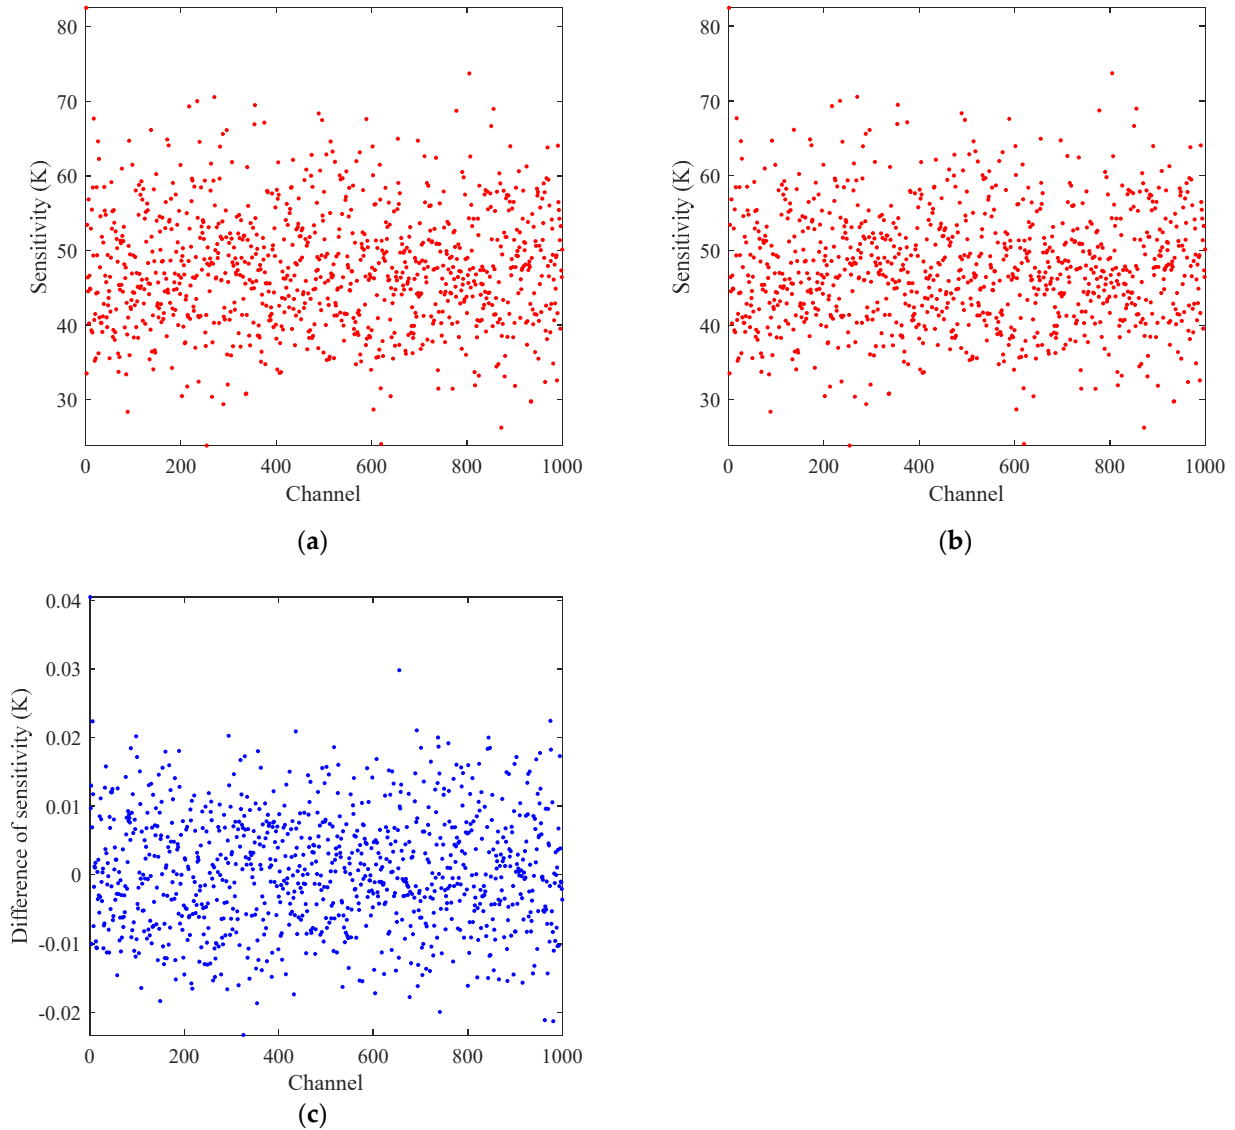

**Figure S1.** The sensitivity obtained by the S-FFT-C method and the S-FFT-R method after one of the simulations at the integration time of 0.5 ms: (a) S-FFT-C method; (b) S-FFT-R method; (c) difference of sensitivity between the two methods for each channel.

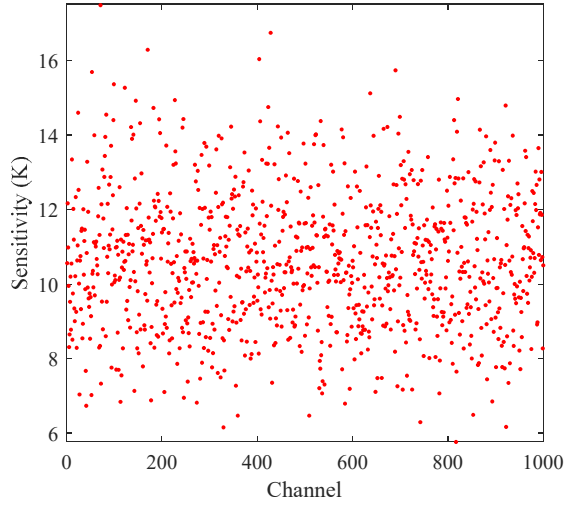

(a)

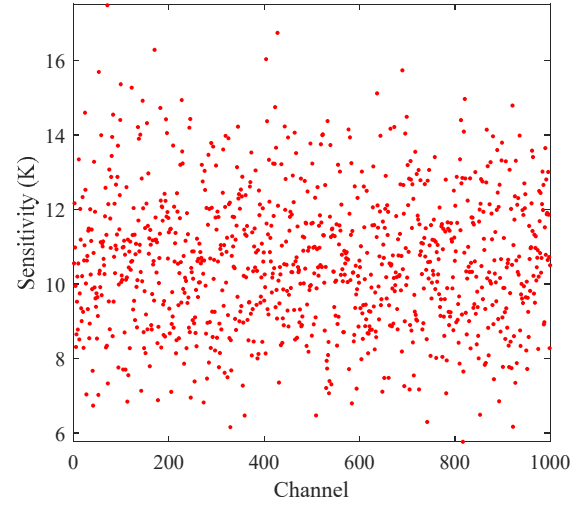

(b)

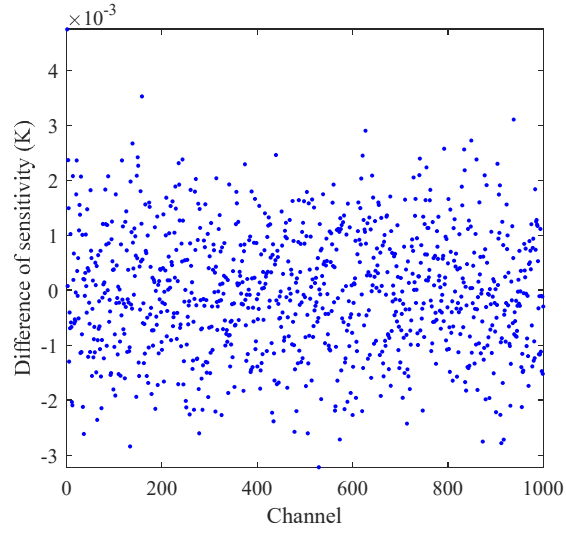

(c)

**Figure S2.** The sensitivity obtained by the S-FFT-C method and the S-FFT-R method after one of the simulations at the integration time of 10 ms: **(a)** S-FFT-C method; **(b)** S-FFT-R method; **(c)** difference of sensitivity between the two methods for each channel.

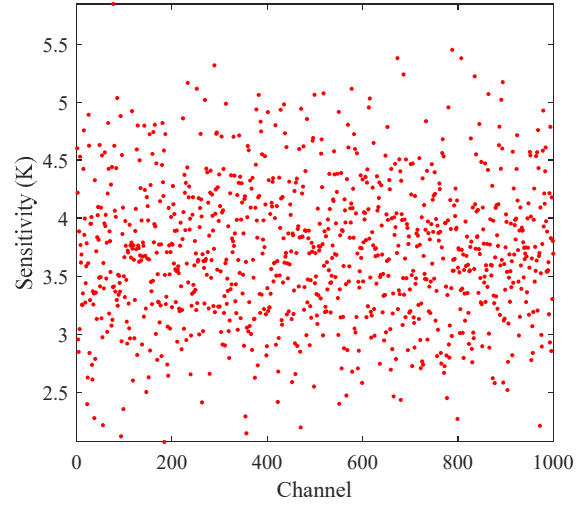

(a)

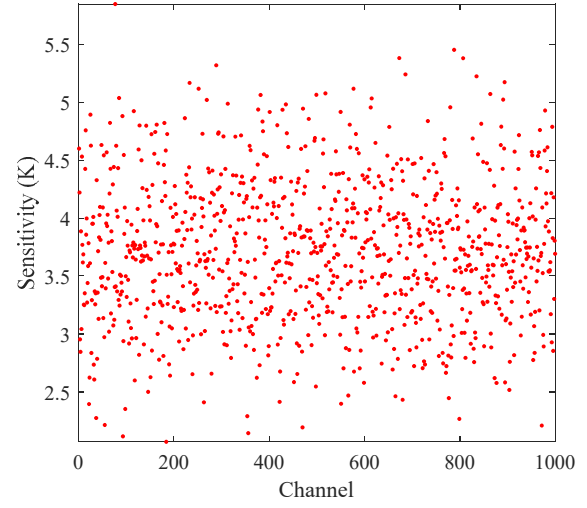

(b)

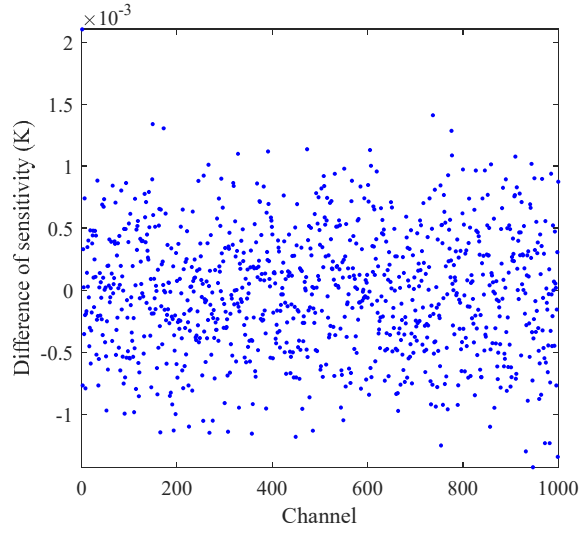

(c)

**Figure S3.** The sensitivity obtained by the S-FFT-C method and the S-FFT-R method after one of the simulations at the integration time of 80 ms: (a) S-FFT-C method; (b) S-FFT-R method; (c) difference of sensitivity between the two methods for each channel.

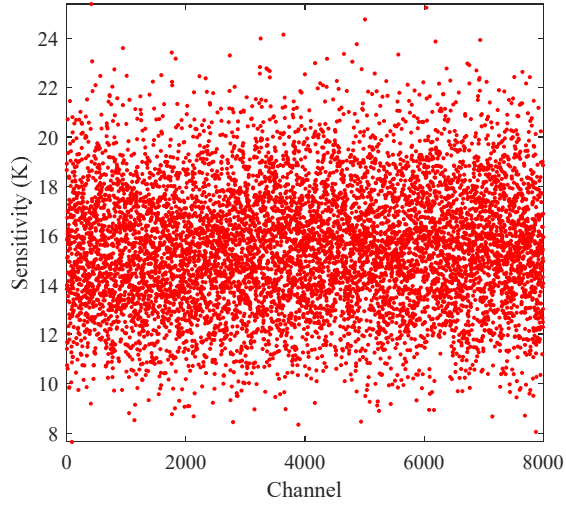

(a)

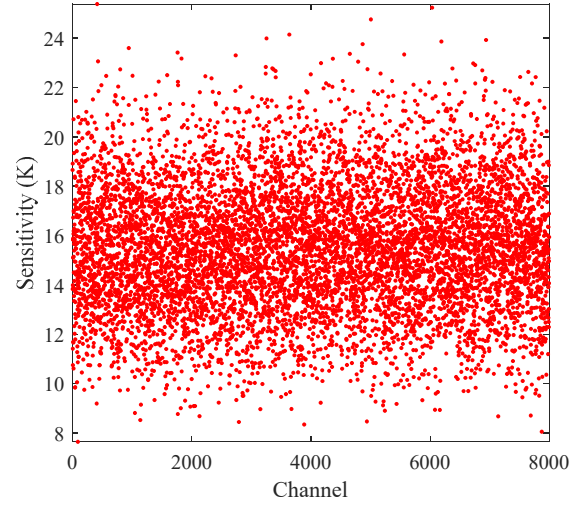

(b)

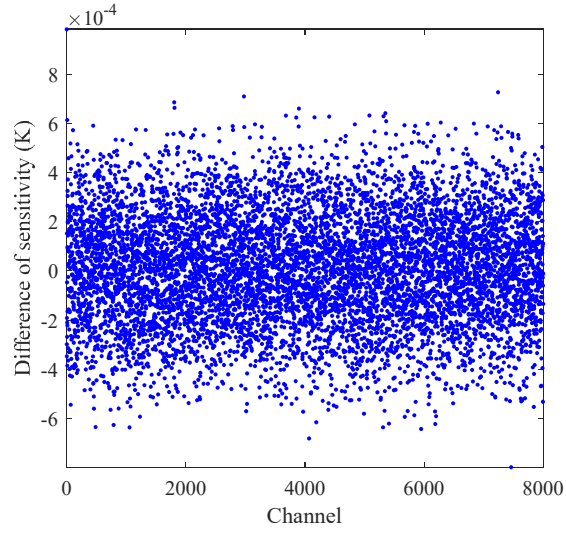

(c)

**Figure S4.** The sensitivity obtained by the S-FFT-C method and the S-FFT-R method after one of the simulations at the spectral resolution of 0.25 MHz: (a) S-FFT-C method; (b) S-FFT-R method; (c) difference of sensitivity between the two methods for each channel.

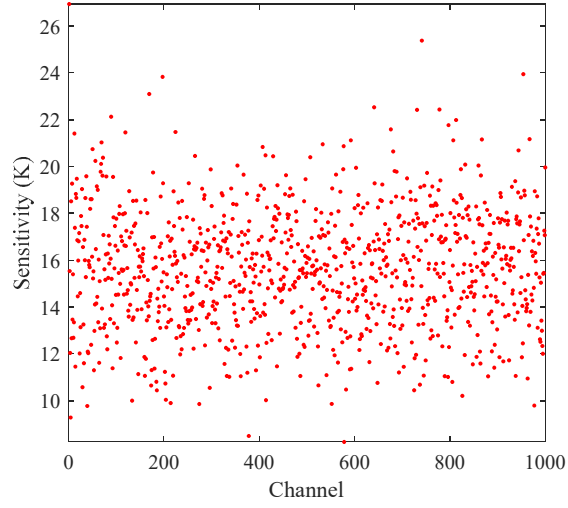

(a)

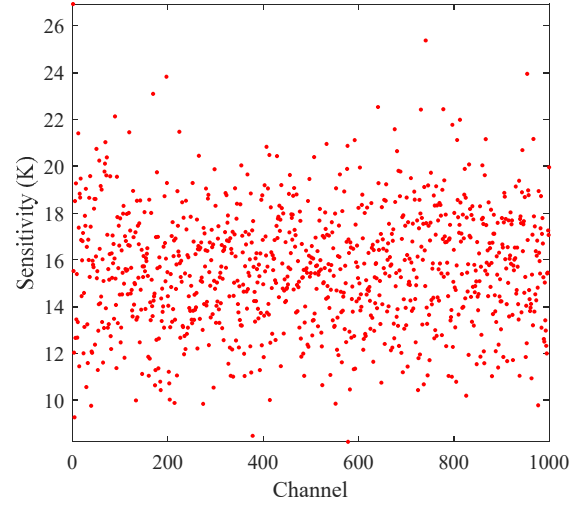

(b)

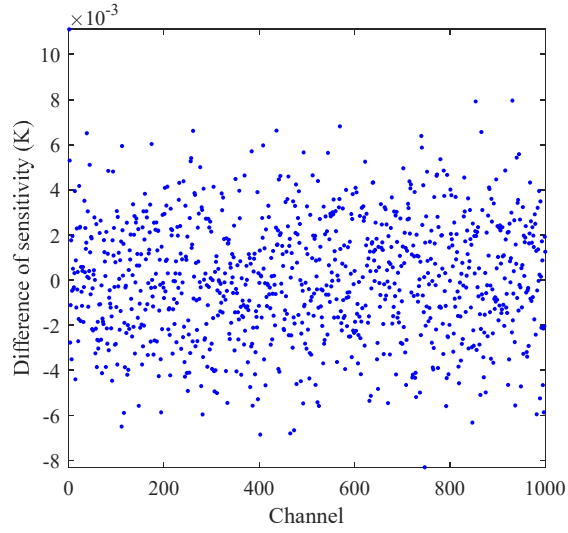

(c)

**Figure S5.** The sensitivity obtained by the S-FFT-C method and the S-FFT-R method after one of the simulations at the spectral resolution of 2 MHz: (a) S-FFT-C method; (b) S-FFT-R method; (c) difference of sensitivity between the two methods for each channel.

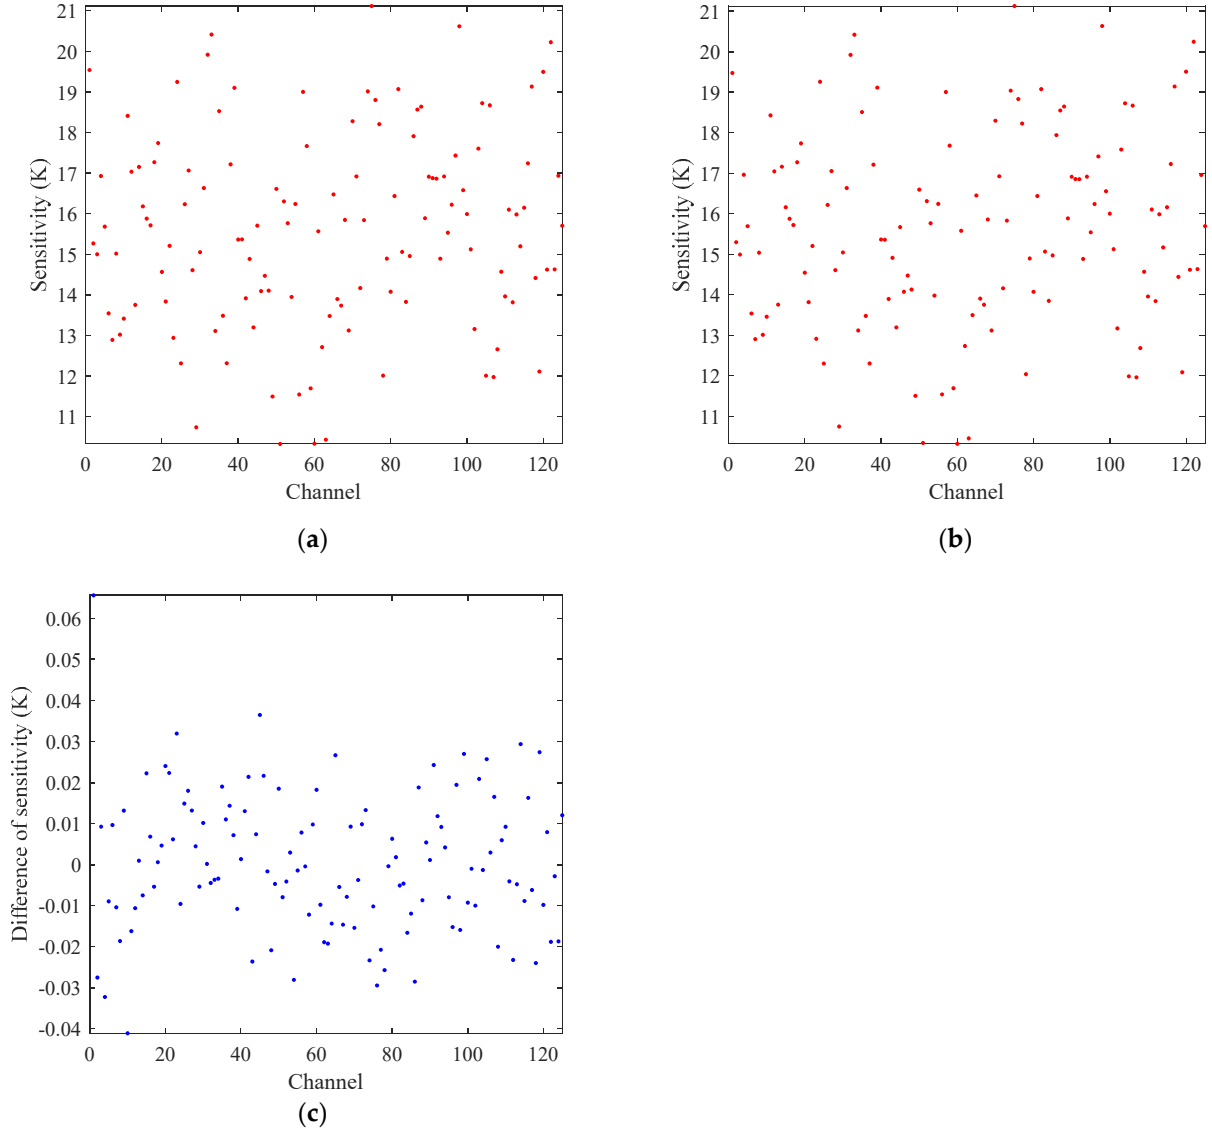

**Figure S6.** The sensitivity obtained by the S-FFT-C method and the S-FFT-R method after one of the simulations at the spectral resolution of 16 MHz: (a) S-FFT-C method; (b) S-FFT-R method; (c) difference of sensitivity between the two methods for each channel.

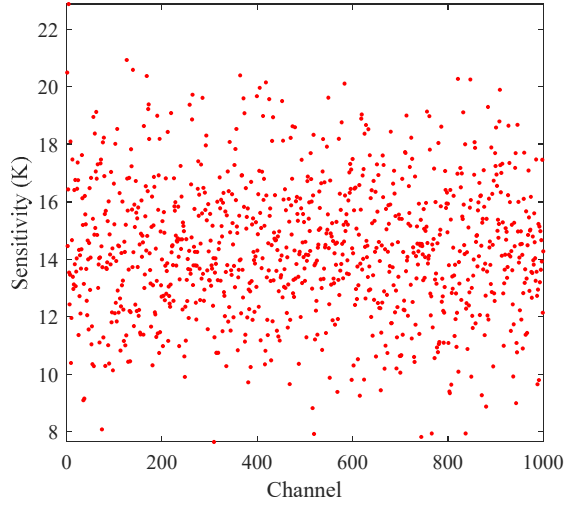

(a)

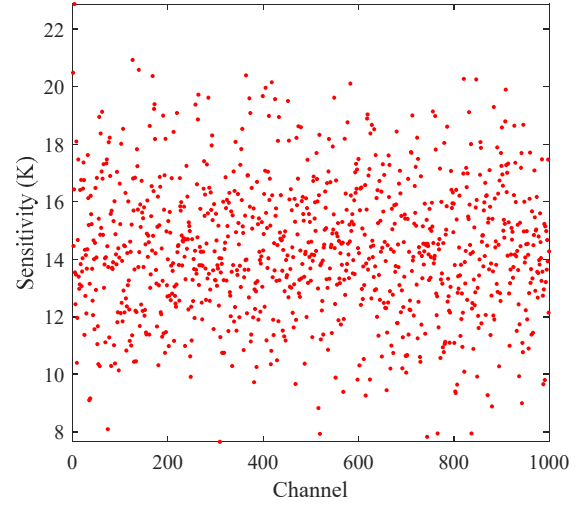

(b)

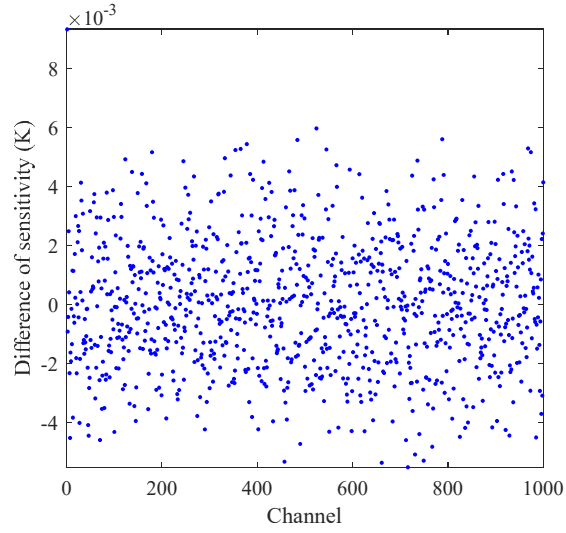

(c)

**Figure S7.** The sensitivity obtained by the S-FFT-C method and the S-FFT-R method after one of the simulations at the quantization bit of 3-bit: (a) S-FFT-C method; (b) S-FFT-R method; (c) difference of sensitivity between the two methods for each channel.

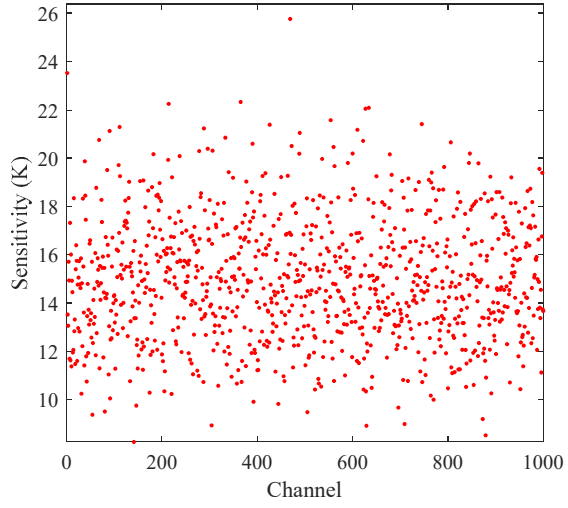

(a)

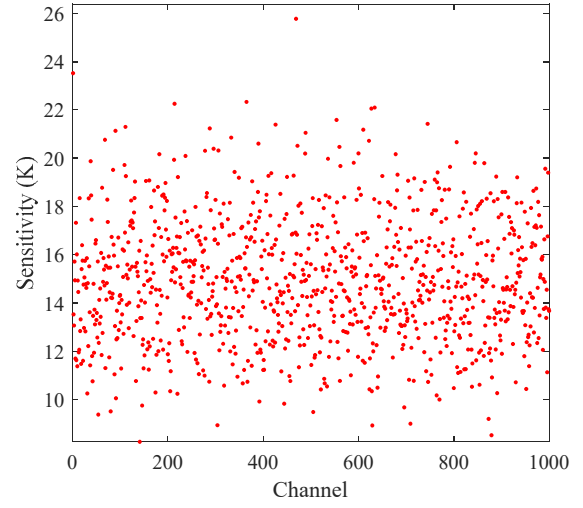

(b)

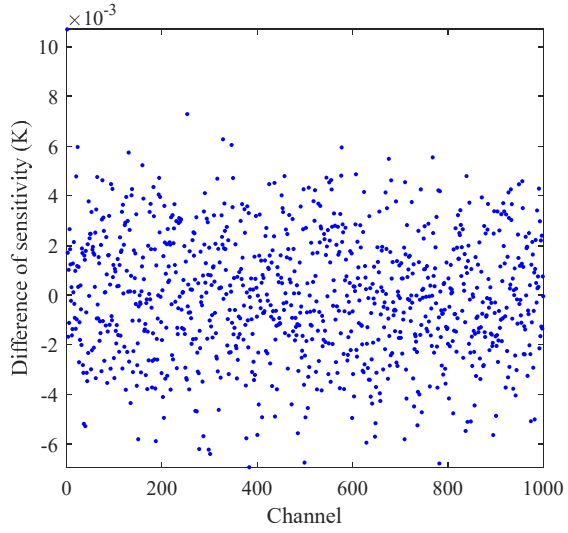

(c)

**Figure S8.** The sensitivity obtained by the S-FFT-C method and the S-FFT-R method after one of the simulations at the quantization bit of 6-bit: (a) S-FFT-C method; (b) S-FFT-R method; (c) difference of sensitivity between the two methods for each channel.



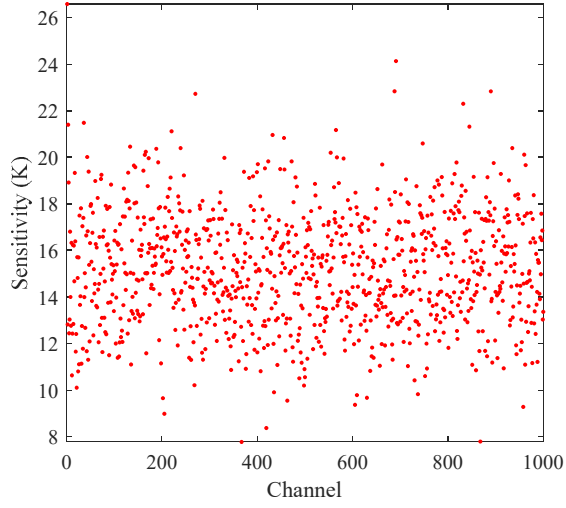

(a)

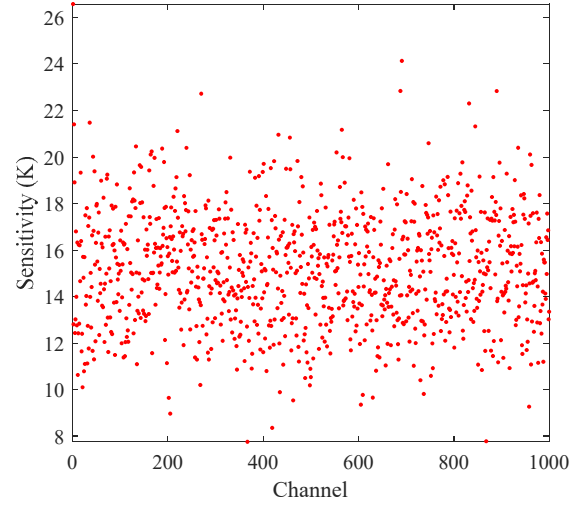

(b)

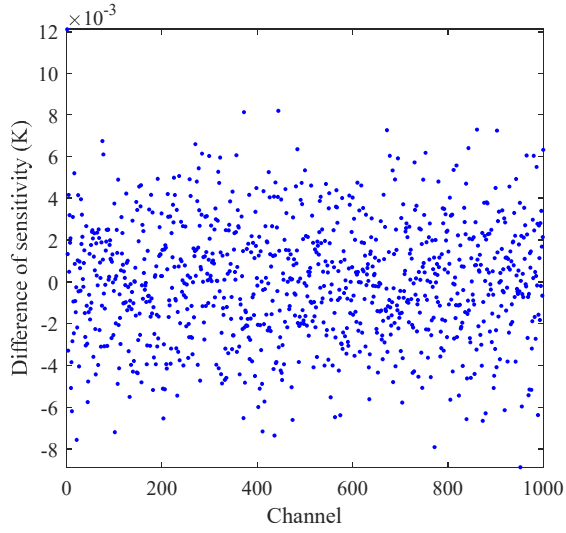

(c)

**Figure S9.** The sensitivity obtained by the S-FFT-C method and the S-FFT-R method after one of the simulations at the quantization bit of 12-bit: (a) S-FFT-C method; (b) S-FFT-R method; (c) difference of sensitivity between the two methods for each channel.
